# Supplementary material
Source: PubMed Central journal article supplement (PMC4059262)
Supplement: am501309d_si_001.pdf [file am501309d_si_001.pdf]

## Supporting Information

“Click” immobilization of a VEGF-mimetic peptide on decellularized endothelial extracellular matrix to enhance angiogenesis

*Lin Wang,<sup>a,b</sup> Meirong Zhao,<sup>a</sup> Siheng Li,<sup>a</sup> Uriel J. Erasquin,<sup>a</sup> Hao Wang,<sup>c</sup> Li Ren,<sup>b</sup> Changyi Chen,<sup>c</sup> Yingjun Wang,<sup>b</sup> Chengzhi Cai<sup>a,\*</sup>*

*a.* Department of Chemistry, University of Houston, Houston, TX 77204, USA.

*b.* Biomaterials Research Center, South China University of Technology, Guangzhou 510640, China

*c.* Molecular Surgeon Research Center, Baylor College of Medicine, Houston, TX 77030, USA

Correspondence Author: Prof. Chengzhi Cai, Tel: 713-743-2710, Email:cai@uh.edu

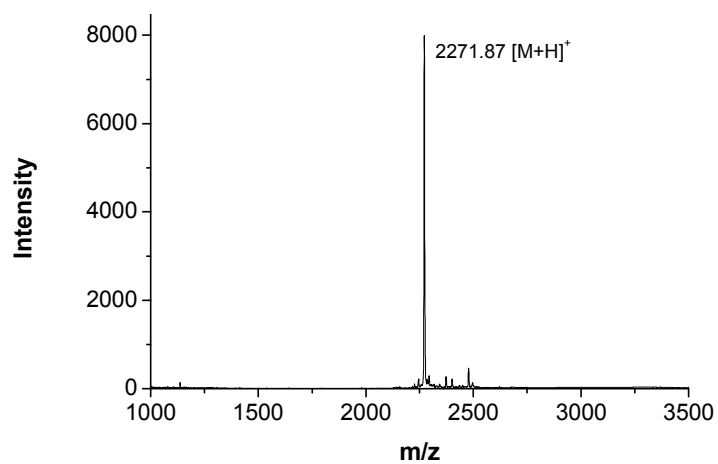

**Figure S1.** MALDI spectra of **QK-EG<sub>6</sub>-N<sub>3</sub>**.

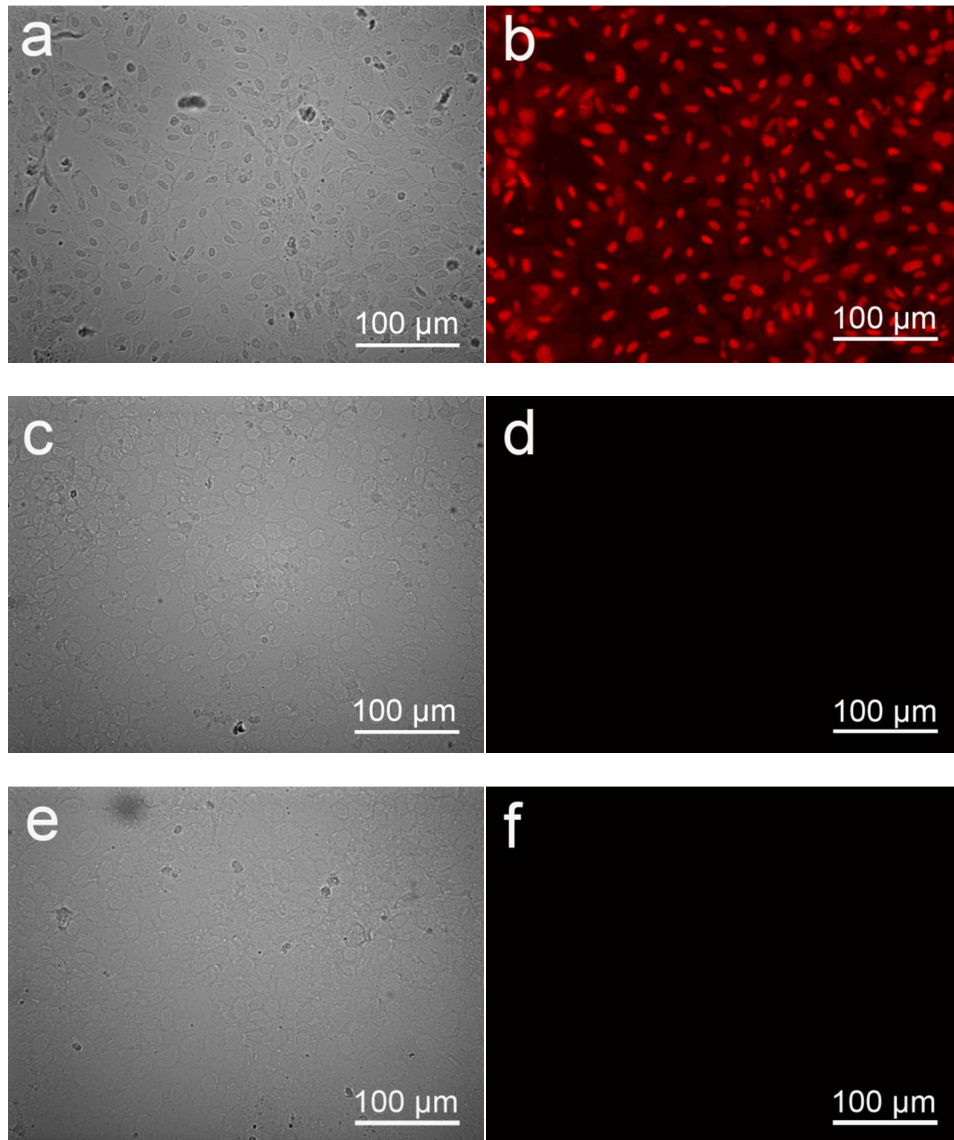

**Figure S2.** Bright field (left) and fluorescence (right) images of HUVECs before (a, b) and after (c-f) decellularization. (c, d): after decellularization of HUVECs without HPG incorporation (**DC-ECM**); (e, f): after decellularization of HUVECs with HPG incorporation (**DC-ECM-HPG**). The fluorescence images (b, d, f) were obtained in TRITC channel of the samples stained with PI.

## X-ray photoelectron spectroscopy (XPS) measurement of **DC-ECM**

For XPS measurement, a PHI 5700 X-ray photoelectron spectrometer equipped with a monochromatic Al K $\alpha$  X-ray source (1486.7 eV) at a takeoff angle (TOA) of 45° from the substrate was used. As expected, the ECM surfaces containing proteins displayed a strong N1s signal (Figure S3).

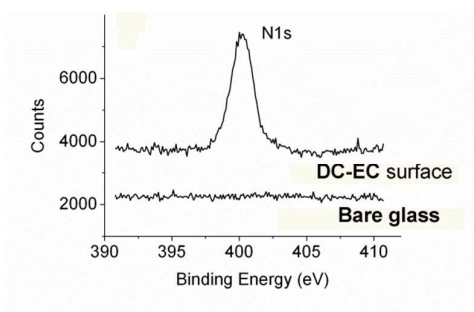

**Figure S3.** XPS narrow scans of the N1s regions of a **DC-ECM** sample and bare glass.

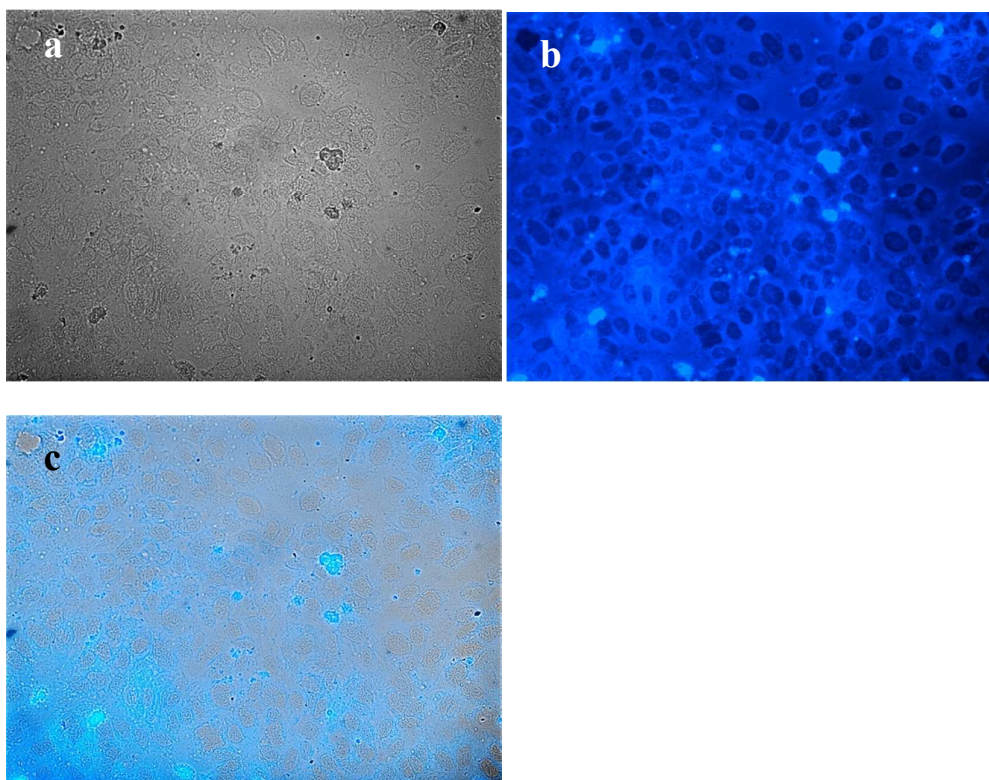

**Figure S4.** Bright field (a), DAPI fluorescence (b) and overlay (c) images ( $455 \times 133 \mu\text{m}^2$ ) of coumarin-triazole ( $\lambda_{\text{em}} = 465 \text{ nm}$ ) in **DC-ECM-HPG** after CuAAC reaction with coumarin-azide **1**.

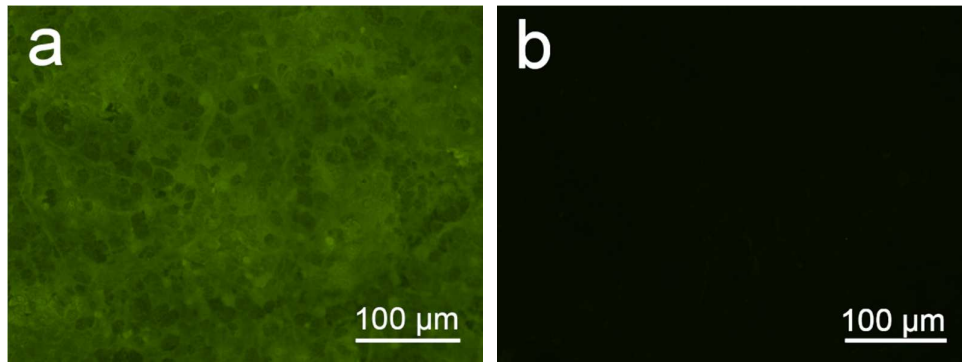

**Figure S5.** Immunofluorescence image of VEGF on decellularized samples. (a) **DC-ECM-QK** treated first with VEGF polyclonal antibody followed by FITC-labeled goat anti-rabbit IgG antibody. (b) Control samples of **DC-ECM-QK** treated with FITC-labeled goat anti-rabbit IgG antibody only.

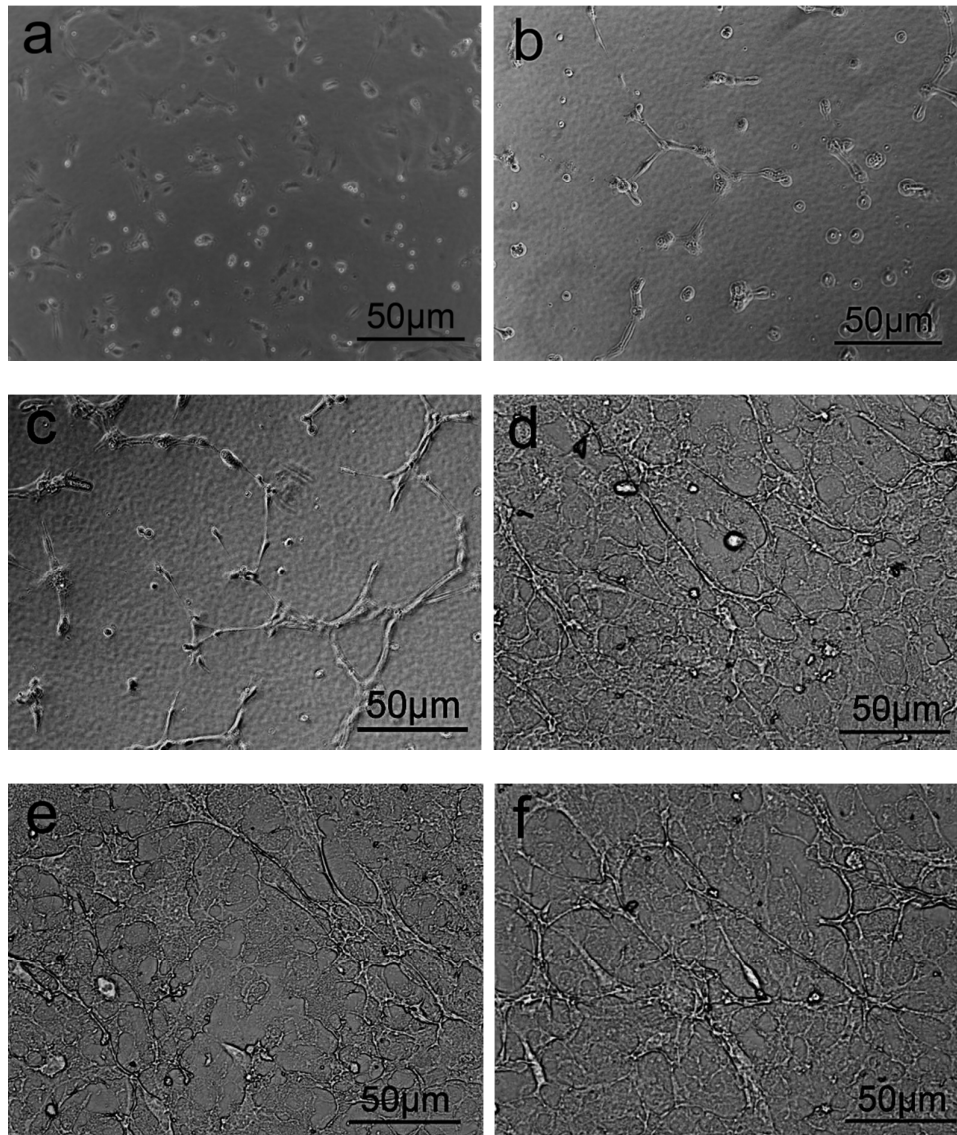

**Figure S6.** Bright field images of HUVECs on bare glass (a), collagen I (b), Matrigel (c), DC-ECM (d), DC-ECM-Ctrl (e) and DC-ECM-QK (f) at 6 h post seeding.
